# Supplementary material for: Fabrication of a self-assembled supramolecular fluorescent nanosensor from functional graphene oxide and its application for the detection of Al3+
Source: Royal Society of Chemistry journal article supplement (doi:10.1039/c8nj03322f), 2018-01-01
Supplement: c8nj03322f1.pdf [file c8nj03322f1.pdf]

**Fabrication of self-assembly supramolecular fluorescent nanosensor  
from functional graphene oxide and application for the detection of**

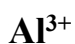

Zengchen Liu,<sup>\*a</sup> Weijie Yang,<sup>a</sup> Boshi Tian,<sup>a</sup> Jin Liu,<sup>a</sup> Wenping Zhu,<sup>a</sup> Gengu Ge,<sup>a</sup> Lina Xiao,<sup>a</sup>

Yuning Meng<sup>a</sup>

***<sup>a</sup>College of Chemistry and Chemical Engineering; Henan Key Laboratory of Rare Earth  
Functional Materials; International Joint Research Laboratory for Biomedical Nanomaterials  
of Henan; The Key Laboratory of Rare Earth Functional Materials and Applications,  
Zhoukou Normal University, Zhoukou 466001, P.R. China***

\*Corresponding author. Tel.: +86 0394 8718252; Fax: +86 0394 8178252.

E-mail address: [liuzengchen@zknu.cn](mailto:liuzengchen@zknu.cn)

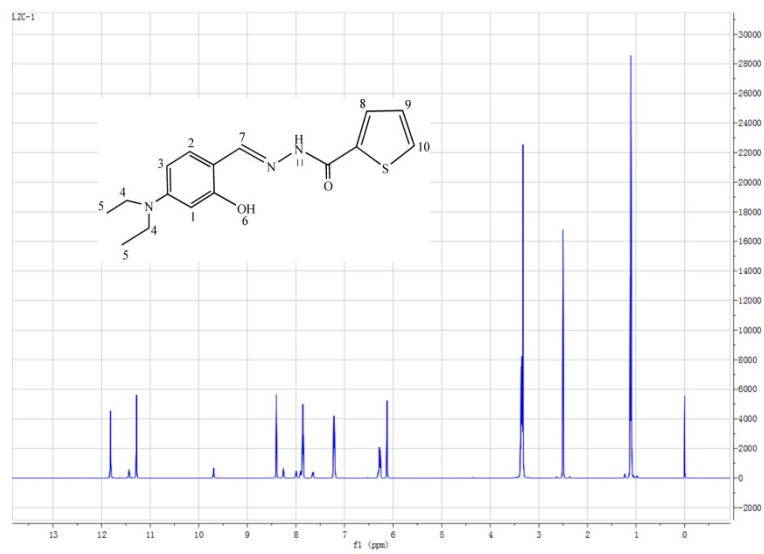

Fig. S1 the <sup>1</sup>H NMR spectrum of L

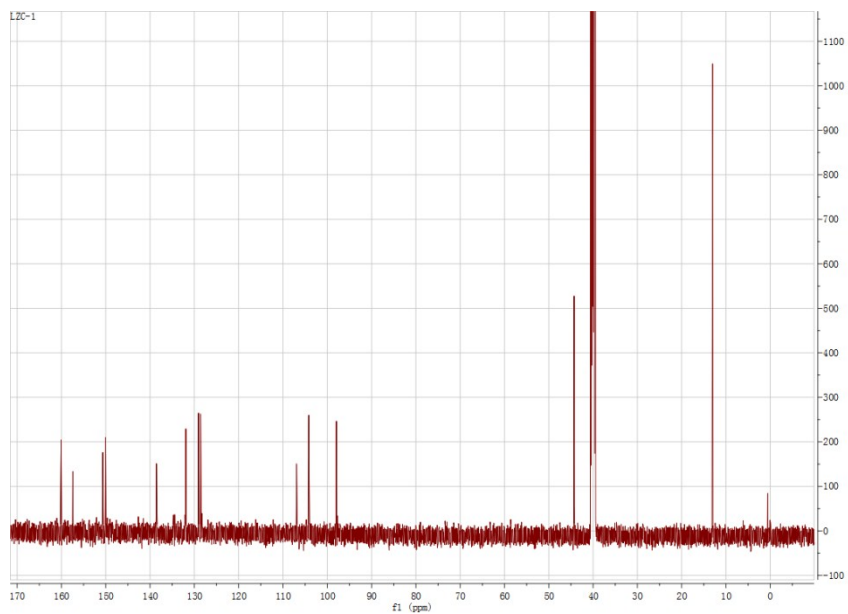

Fig. S2 the  $^{13}\text{C}$ NMR spectrum of L
